# Establishment of primary transgenic human airway epithelial cell cultures to study respiratory virus – host interactions

Hulda R. Jonsdottir<sup>1,2,#a,b</sup>, Sabrina Marti<sup>1,2</sup>, Dirk Geerts<sup>3</sup>, Regulo Rodriguez<sup>4</sup>, Volker Thiel<sup>1,2§</sup> and Ronald Dijkman<sup>1,2,5§\*</sup>

<sup>1</sup> Institute of Virology and Immunology, Bern & Mittelhäusern, Switzerland.

<sup>2</sup> Department of Infectious Diseases and Pathobiology, Vetsuisse Faculty, University of Bern, Bern, Switzerland.

<sup>3</sup> Department of Medical Biology, Amsterdam University Medical Center, Amsterdam, The Netherlands

<sup>4</sup> Institute of Pathology, Cantonal Hospital St.Gallen, St.Gallen, Switzerland.

<sup>5</sup> Institute for Infectious Diseases, University of Bern, Bern, Switzerland.

<sup>#a</sup> Current address: SPIEZ Laboratory, Spiez, Switzerland,

<sup>#b</sup> Current address: Institute of Microbiology, Lausanne University Hospital and University of Lausanne, Lausanne, Switzerland

<sup>§</sup> Contributed equally.

<sup>\*</sup> Correspondence: Ronald Dijkman, Institute of Virology and Immunology, Department of infectious Diseases and Pathobiology, Vetsuisse Faculty, University of Bern, Länggassstrasse 122, 3012 Bern, Switzerland. Tel: +41 31 631 2259, Email: ronald.dijkman@vetsuisse.unibe.ch.

Received: date; Accepted: date; Published: date

**Abstract:** Primary human airway epithelial cell (hAEC) cultures represent a universal platform to propagate respiratory viruses and characterize their host interactions in authentic target cells. To further elucidate specific interactions between human respiratory viruses and important host factors in airway epithelium, it is important to make hAEC cultures amenable to genetic modification. However, the short and finite lifespan of primary cells in cell culture creates a bottleneck for the genetic modification of these cultures. In the current study, we show that the incorporation of the Rho-associated protein kinase (ROCK) inhibitor (Y-27632) during cell propagation extends the life span of primary human cells in vitro and thereby facilitates the incorporation of lentivirus-based expression systems. Using fluorescent reporters for FACS-based sorting, we generated homogeneously fluorescent hAEC cultures that differentiate normally after lentiviral transduction. As proof-of-principle, we demonstrate that host gene expression can be modulated post-differentiation via inducible short hairpin (sh)RNA-mediated knockdown. Importantly, functional characterization of these transgenic hAEC cultures with exogenous poly(I:C), as a proxy for virus infection, demonstrates that such modifications do not influence the host innate immune response. Moreover, the propagation kinetics of both human coronavirus 229E (HCoV-229E) and human respiratory syncytial virus (RSV) were not affected. Combined, these results validate our newly established protocol for the genetic modification of hAEC cultures thereby unlocking a unique potential for detailed molecular characterization of virus – host interactions in human respiratory epithelium.

**Keywords:** respiratory viruses; virus – host interactions; human airway epithelial cell cultures

## 1. Introduction

The human lungs are a large organ and span a relatively long anatomical distance. As a result, pulmonary histology differs substantially depending on anatomical location and specific tissue function. The upper airways are ciliated, pseudostratified and contain multiple cell types with varying roles in the differentiated tissue [1]. Goblet cells produce protective mucus, ciliated cells are responsible for cleaning out both mucus and debris [2], while basal cells serve as resident progenitor cells and replenish other cell types [3].

Human airway epithelial cell (hAEC) cultures are organotypic air-liquid interface (ALI) cell cultures that morphologically and functionally resemble the human airway in vivo [4]. Currently, both the upper and lower airways can be recapitulated in vitro by using this cell culture system. To establish ALI cell cultures, the cells are cultured on porous inserts where only the basolateral side is in contact with growth medium while the apical side is exposed to air, resembling the orientation of in vivo airway epithelium. To represent different areas of the pulmonary epithelium, different cell types

53 can be cultured in the system. Tracheobronchial hAEC cultures contain, after differentiation, different  
54 cell types, including basal, ciliated and goblet cells. Moreover, these cultures are pseudostratified and  
55 generate protective mucus much like in vivo tracheobronchial epithelium [5,6]. As a result, such  
56 cultures are ideal for virus - host interaction studies with human respiratory viruses since they  
57 represent the primary entry point of these pathogens [7–13]. Traditionally, virus – host interactions  
58 are studied in animal models and human respiratory viruses are usually investigated in ferrets and  
59 transgenic mice [14,15]. However, in order to infect these animals, viruses often have to be adapted  
60 to the animal by serial passage and this may cause both genotypic and phenotypic differences  
61 between the original human virus and the adapted one. Furthermore, it is often difficult to translate  
62 results obtained in animal models directly to human disease. Therefore, it is important to study human  
63 viruses in authentic human target cells. We, and others, have previously demonstrated that hAEC  
64 cultures serve as a universal platform for the study and propagation of human respiratory viruses  
65 [7–13].

66 However, in order to fully utilize the potential of this culture system it must be made amenable to  
67 genetic modification. Transgenesis would enable the study of viral and/or host factors important for  
68 respiratory virus infections and allow for the elucidation of specific mechanism involved in virus-host  
69 interactions by targeted gene knockdown or overexpression. However, using primary cells for genetic  
70 modification is challenging since they have a finite life span in cell culture. Primary human bronchial  
71 cells can only be limitedly passaged after isolation if differentiation capabilities are to be maintained  
72 [16]. The incorporation of the Rho-associated protein kinase (ROCK) inhibitor Y-27632 has been  
73 shown to increase the number of passages primary cells can undergo in vitro without gross influence  
74 on cell differentiation capacity [17,18]. Theoretically, this would enable the generation of genetically  
75 modified well-differentiated primary human airway epithelium in vitro.

76 Due to the extended culture time required for hAEC culture establishment and differentiation,  
77 and the fact that well-differentiated cultures can be maintained for months [19], stable integration of  
78 any genes to be expressed post-differentiation is required. Therefore, we established our protocol  
79 using lentiviral vectors, where the proviral genomic material is integrated directly into the cellular  
80 genome. Furthermore, such a system allows for the integration of both transgene and shRNA  
81 scaffolds for over expression and/or knockdown of both host and viral factors [20–22]. Although  
82 protocols for the generation of transgenic airway epithelium for various purposes have been  
83 described [23–25], thus far there have been no reports describing whether lentivirus modification of  
84 well-differentiated hAECs alters the host innate immune response and/or susceptibility to viral  
85 infection.

86 In order to establish homogeneously transgenic hAEC cultures suitable for characterization of  
87 virus – host interactions we adapted our current cell culture protocol to generate genetically modified  
88 well-differentiated hAECs with uniform transgene distribution. As proof-of-principle, we assessed  
89 whether the host gene expression can be modulated post-differentiation via inducible short hairpin  
90 (sh)RNA-mediated knockdown and determined whether this affected the innate immune response or  
91 the susceptibility to viral infection by two common cold viruses.

## 92 **2. Materials and Methods**

### 93 *2.1 Cell culture*

94 The human cell lines 293LTV (LTV-100; Cellbiolabs, San Diego, California, USA) and Huh-7 (gift  
95 from V. Lohmann) were maintained in Dulbecco's Modified Eagle Medium-GlutaMAX supplemented  
96 with 1 mM sodium pyruvate, 10% heat-inactivated fetal bovine serum, 100 µg/ml Streptomycin, 100  
97 IU/ml Penicillin and 0.1 mM MEM Non-Essential Amino Acids (Gibco; Thermo Fisher Scientific). All  
98 cell lines were culture at 37°C in a humidified incubator with 5% CO<sub>2</sub>.

### 99 *2.2 Human airway epithelial cell culture*

100 Primary human tracheobronchial cells were isolated from patients (>18 years old) undergoing  
101 bronchoscopy or pulmonary resection at the Cantonal Hospital in St. Gallen, Switzerland, in  
102 accordance with our ethical approval (EKSG 11/044, EKSG 11/103 and KEK-BE 302/2015). Isolation  
103 of cells was performed with protease and DNase digestion and primary human tracheobronchial cells

104 were cultured as previously described [19], with the following modifications. Monolayer cultures of  
105 primary tracheobronchial epithelial cells were cultured on collagen-coated flasks in complete  
106 Bronchial Epithelial Growth Medium (BEGM) supplemented with 100 µg/ml Streptomycin, 100 IU/ml  
107 Penicillin, and with or without 10 µM Rho-associated protein kinase inhibitor (Y-27632, Abcam,  
108 Cambridge, United Kingdom). For establishment of well-differentiated airway epithelial cell cultures,  
109 primary human tracheobronchial epithelial cells were seeded in BEGM with or without 10 µM Y-27635  
110 onto Collagen Type IV coated 24-well Transwell HTS plates (Corning) at the density of 250.000 cells  
111 per cm<sup>2</sup>. Once cells reached confluency, the apical and basolateral medium was changed to air-liquid  
112 interphase (ALI) medium, and one day later the apical side medium was aspirated, establishing ALI.  
113 The epithelial layer was allowed to differentiate for at least four weeks prior to any analyses.  
114 Basolateral medium was changed every other day during the differentiation period. Additionally, the  
115 cell layer was washed with 200 µL Hank's Balanced Salt Solution (HBSS, Gibco; Thermo Fisher  
116 Scientific) once a week.

### 117 *2.3 Lentiviral vectors*

118 Third-generation lentiviral packaging plasmids (pMDL (gagPol), pRev, pVSV-g) were generously  
119 provided by Prof. Dr. B. Berkhout and Dr. J. Eekels along with the eGFP-modified pLKO backbone  
120 containing a non-mammalian short-hairpin (sh)RNA control (pLKO\_GFP; Mission™ SHC202) that  
121 should not target any known mammalian gene, but will engage with RISC [26]. The Isopropyl  
122 β-D-1-thiogalactopyranoside (IPTG)-inducible lentiviral backbone pLKO-puro-IPTG\_3xLacO  
123 harboring the non-mammalian shRNA control was purchased (Mission™ SHC332; Sigma Aldrich,  
124 Buchs, Switzerland). The puromycin resistance gene was replaced via restriction digestion cloning  
125 using a PCR-amplified fluorescent mCherry marker containing overhangs with compatible restriction  
126 sites to generate the pLKO-mCherry\_IPTG\_3xLacO lentiviral backbone.

### 127 *2.4 shRNA ligation*

128 The shRNA sequences TRCN0000231750 and TRCN0000231753 for knockdown of eGFP were  
129 extracted from the RNAi consortium website (<https://www.broadinstitute.org/rnai/public/>) and ordered  
130 as separate sense and antisense strands (Microsynth AG, Balgach, Switzerland) incorporating  
131 specific restriction sites. shRNA oligos were annealed in CutSmart buffer (New England Biolabs) by  
132 incubation of the sense and antisense strands at 94°C for 10 minutes and slow cooling to room  
133 temperature (RT). The generated double stranded shRNAs were inserted into the  
134 pLKO-mCherry\_IPTG\_3xLacO lentiviral backbone via restriction digestion cloning.

### 135 *2.5 Lentiviral particle production*

136 Low passage 293LTV cells were seeded in 2.2 mL of culture medium in a T25 cell culture flask  
137 (TPP, Trasadingen, Switzerland) at a density of 880.000 cells/cm<sup>2</sup> 16 - 18 hours prior to transfection.  
138 For transfection, a total of 2.4 µg transfer vector, 1.6 µg pMDL, 0.6 µg pRev and 0.8 µg pVSV-g was  
139 transfected into the cells using Lipofectamine 2000® (Fisher Scientific AG, Reinach, Switzerland)  
140 according to the manufacturer protocol. Twenty-four hours post-transfection, the medium was  
141 replaced with BEGM and incubated for an additional 24 – 48 hours before lentivirus-containing  
142 supernatant was collected on ice and spun down at 400 x *rcf* for 5 minutes at 4°C. Lentiviral titer was  
143 estimated using the GoStix rapid lentiviral titer detection kit (Takara Bio Europe SAS,  
144 Saint-Germain-en-Laye, France). Lentiviruses were either used directly for transduction of primary  
145 tracheobronchial cells or stored at -80°C.

### 146 *2.6 Lentiviral transduction*

147 Undifferentiated primary human tracheobronchial cells were transduced in suspension with 500  
148 µL lentiviral supernatant for 4 hours at 37°C in batches of 100.000 cells in 1 mL total BEGM,  
149 supplemented with 10 µM Y-27635, with gentle shaking every hour. Subsequently, cells were seeded  
150 into T25 flasks (TPP) for monolayer culture in 4 mL total medium with lentiviral supernatant for 24  
151 hours prior to washing with HBSS and cell maintenance as described above. Control cells were

152 incubated accordingly to account for any experimental effects. Once confluent, cells were expanded  
153 into T75 flasks (TPP).

### 154 2.7 Flow Cytometry

155 Cells were trypsinized with 0.05% Trypsin/EDTA (Gibco), resuspended and fixed with 1 mL 4%  
156 buffered formalin (FORMAFIX, Formafix Switzerland AG, Hittnau, Switzerland) at RT for 15 minutes  
157 and washed with PBS (400 x *rcf*, 5 min, 4°C). Cells were stained with antibodies against tubulin  
158 (3624S, Alexa Fluor-488; Cell Signaling, Bioconcept AG, Allschwil, Switzerland), Nerve growth factor  
159 receptor (NGFR, 562122, PE-Cy7; BD Bioscience) and Mucin 1 (355604, PE; Biolegend, London,  
160 United Kingdom) in 100 µL Cell Wash buffer (CWB, BD Bioscience, Allschwil, Switzerland) in batches  
161 of 200.000 cells on ice for 20 minutes and washed twice in 1 mL CWB (400 x *rcf*, 5 min, 4°C) Cells  
162 were then resuspended in 100µL of CWB and analyzed with FACS Canto (BD Bioscience). For  
163 quantification of GFP expression, cells were analyzed by flow cytometry directly. Prior to analysis  
164 cells were fixed as described above and subsequently washed with HBSS. Cells were then  
165 resuspended in HBSS and analyzed with FACS Canto using non-transduced cells as negative  
166 control.

### 167 2.8 FACS sorting

168 After lentiviral transduction and monolayer expansion, transduced cells were sorted for single  
169 positive mCherry signal or double positive mCherry/eGFP signal at 4°C using FACS Aria III and the  
170 corresponding FACS Diva software (BD Bioscience). Cells were sorted from HBSS supplemented  
171 with 10 µM Y-27632, and 0.1% Pluronic (Sigma Aldrich) into BEGM supplemented with 10 µM  
172 Y-27632 in FACS flow (BD Bioscience) and washed with HBSS (400 x *rcf*, 5 min, 4°C) prior to further  
173 culturing. Cells were resuspended in complete BEGM supplemented with 10 µM Y-27632,  
174 amphotericin B and gentamicin (Sigma Aldrich). Medium was changed to complete BEGM  
175 supplemented with 10 µM Y-27632 the next day and every other day thereafter until 90% confluency  
176 was reached. Cells were then expanded to larger culture flasks. Cells were sorted at the FACS core  
177 facility, Institute of Pathology, University of Bern, Bern, Switzerland.

### 178 2.9 Immunofluorescence

179 hAEC cultures were fixed and stained for immunofluorescence as previously described (19).  
180 Well-differentiated cultures were stained using the following primary and secondary antibodies  
181 (tables 1 and 2).

182 **Table 1.** Overview of primary antibodies used in the current study

| 1° Antibody    | Target          | Dilution | Host    | Clone    | Supplier     |
|----------------|-----------------|----------|---------|----------|--------------|
| Anti-β-Tubulin | Cilia           | 1:200    | Mouse   | ONS 1A6  | Abcam        |
| Anti-ZO-1      | Tight junctions | 1:200    | Goat    | Ab99462  |              |
| Anti-eGFP      | eGFP            | 1:200    | Mouse   | Ab1281   |              |
| Anti-mCherry   | mCherry         | 1:200    | Chicken | Ab205402 |              |
| Anti-ZO-1      | Tight Junctions | 1:200    | Rabbit  | 61-7300  | Thermofisher |

183 **Table 2.** Overview of secondary antibodies used in the current study

| 2° Antibody      | Target       | Dilution | Host   | Supplier               |
|------------------|--------------|----------|--------|------------------------|
| Alexa Fluor® 488 | Anti-mouse   | 1:400    | Donkey | Jackson Immunoresearch |
| Cy3              | Anti-goat    | 1:400    |        |                        |
| Alexa Fluor® 647 | Anti-goat    | 1:400    |        |                        |
| Alexa Fluor® 594 | Anti-chicken | 1:400    |        |                        |
| Alexa Fluor® 647 | Anti-rabbit  | 1:400    |        |                        |

184

185 All samples were counterstained with DAPI (4',6-diamidino-2-phenylindole; Invitrogen, Fisher  
186 Scientific AG, Reinach, Switzerland) to visualize nuclei. Images were acquired on a Nikon confocal  
187 microscope A1 (Nikon GmbH, Egg, Switzerland) combined with an ECLIPSE Ti inverted microscope  
188 using a Plan Apo 60x/1.40 oil objective. Image capture, analysis and processing were performed  
189 using the Nikon (NIS-Elements AR 3.30.02) and Imaris 8.0.2 (Bitplane AG, Zurich, Switzerland)  
190 software packages.

#### 191 *2.10 Cell viability*

192 Cell viability was assessed with Alamar Blue (Thermo Fisher Scientific). Alamar Blue was added  
193 to growth medium at 10% (v/v) end concentration and incubated at 37°C and 5% CO<sub>2</sub> for at least 4  
194 hours, depending on cell density. After incubation, fluorescence was measured in a luminometer at  
195 595 nm.

#### 196 *2.11 Virus infection*

197 Transgenic and naïve hAEC cultures were inoculated apically with 10.000 plaque forming units  
198 (PFU) of either human coronavirus 229E (HCoV-229E GFP [27]) or human respiratory syncytial virus  
199 (RSV-B GFP, [28]; kindly provided by Prof Dr. Paul Duprex, Boston University, School of Medicine)  
200 and incubated for 2 hours at 33°C in a humidified incubator with 5% CO<sub>2</sub>. Subsequently, inoculum  
201 was removed, and the apical surface washed three times with HBSS, after which the cells were  
202 incubated for 72 hours, with progeny virus collection every 24 hours by incubating 100 µL of HBSS on  
203 the apical surface for 10 minutes prior to collection. In parallel, basolateral medium supplemented  
204 with 0 or 2 mM IPTG was replaced every 24 hours. Progeny virus collections were stored 1:1 in virus  
205 transport medium (VTM) for later quantification [19].

#### 206 *2.12 eGFP knockdown*

207 For eGFP knockdown in well-differentiated dually transduced hAEC cultures, cells were treated  
208 with 0 or 2 mM IPTG in basolateral medium over a period of 6 days, with media change every 24  
209 hours. eGFP expression was analyzed on transcriptional level with qPCR, and on protein level via  
210 immunofluorescence and flow cytometry at the end of the treatment period.

#### 211 *2.13 Quantitative Real-time PCR (qRT-PCR)*

212 Total cellular RNA from well-differentiated hAECs was extracted with the Nucleospin™ RNA  
213 extraction kit (Macherey-Nagel, Oensingen, Switzerland) according to the manufacturer's guidelines.  
214 Reverse transcription was performed with GoScript™ reverse transcriptase mix random hexamers  
215 according to the manufacturer's protocol (A2800; Promega AG, Dübendorf, Switzerland) using 200  
216 ng of total RNA. Two microliters of tenfold diluted cDNA was amplified using Fast SYBR™ Green  
217 Master Mix (Thermo Fisher Scientific) according to the manufacturer's protocol using primers  
218 targeting 18S and MxA as described previously [12]. Relative gene expression was calculated using  
219 the 2- $\Delta\Delta$ Ct method [29] and is shown as fold induction over untreated controls.

220 For quantification of progeny virus in apical washes from HCoV-229E and RSV infected hAECs,  
221 viral RNA was extracted using the NucleoMag VET (Macherey-Nagel) according to the  
222 manufacturer's instructions on a Kingfisher Flex Purification system (Thermo Fisher Scientific). Two  
223 microliters of extracted RNA was amplified using TaqMan™ Fast Virus 1-Step Master Mix (Thermo  
224 Fisher Scientific) according to the manufacturer's protocol and primers specific for HCoV-229E [30] or  
225 RSV-B [31], or eGFP forward primer 5'- GGG CAC AAG CTG GAG TAC AAC -3' and reverse primer  
226 5'- CAC CTT GAT GCC GTT CTT CTG -3'. Measurements and analysis were performed using an  
227 ABI7500 instrument and software package (Applied Biosystems, Fisher Scientific AG, Reinach,  
228 Switzerland).

#### 229 *2.14 Data presentation*

230 Data was plotted using GraphPad Prism 7 and figures were assembled in Adobe Illustrator CC  
231 2018 software package.



## 232 3. Results

### 233 3.1 Transduction of undifferentiated primary human bronchial cells

234 In an initial effort to establish transgenic hAEC cultures, we attempted to transduce  
235 well-differentiated cultures directly with vesicular stomatitis virus glycoprotein (VSV-g) pseudotyped  
236 lentiviral particles harboring a pLKO\_GFP transfer vector. However, intact cultures are refractory to  
237 both apical and basolateral transduction while damaged cultures can be transduced from the apical  
238 side when the basolateral side of the epithelium is exposed. In those cultures, GFP expression is only  
239 observed around the edges of damaged epithelium (data not shown). This is consistent with the  
240 observation that receptors for VSV-g are predominantly located on the basolateral side of polarized  
241 epithelia [32]. Since well-differentiated hAEC cultures cannot be efficiently transduced, we assessed  
242 the optimal duration and method of transduction of human bronchial cells in their undifferentiated  
243 state with VSV-g pseudotyped lentiviral particles harboring the GFP-modified pLKO backbone  
244 containing a non-mammalian shRNA control that should not target any known mammalian gene  
245 (pLKO\_GFP\_Scr), but will engage with the RNA-Induced Silencing Complex (RISC). We observed  
246 that GFP expression in undifferentiated bronchial cells generally varied between experiments.  
247 However, suspension transduction consistently resulted in the highest percentage of GFP-positive  
248 cells. Further modifications of the protocol such as the addition of polybrene, separately or in  
249 combination with spinoculation, did not seem to increase the efficacy of transduction (data not  
250 shown), leading to the final optimized protocol that utilizes suspension transduction for 4 hours,  
251 followed by additional 24-hour incubation of lentivirus containing supernatant during cell attachment  
252 in monolayer. Specifically, cells and lentiviral supernatant were incubated in suspension at 37°C and  
253 5% CO<sub>2</sub> with gentle shaking every hour for 4 hours, after which the mixture was seeded in T25 culture  
254 flasks in 4 mL total Bronchial Epithelial Growth Medium (BEGM). Medium was changed after 24  
255 hours, bringing the total lentiviral incubation time to 28 hours. Using this protocol, we were able to  
256 transduce primary bronchial cells with an efficacy of 30-70%, depending on the donor and MOI used.

257 Since the distinctive cellular composition of well-differentiated hAEC cultures is essential to all  
258 virus – host interaction studies, the morphology of transgenic and naïve cultures must be  
259 interchangeable to preserve the functionality of the culture system. Using the established  
260 transduction protocol, we first evaluated whether hAECs differentiated normally after lentiviral  
261 transduction using flow cytometry. The cellular composition of heterogeneously transgenic hAECs  
262 that have the pLKO\_GFP\_Scr cassette integrated in their genome does not differ from naïve cultures,  
263 as measured by the division into ciliated (tubulin), goblet (Mucin1) and basal cells (NGFR) (Figure  
264 1A). More importantly, GFP expression can be observed in all cellular subgroups within the  
265 differentiated cultures (Figure 1B). This data indicates that lentiviral transduction does not interfere  
266 with the differentiation potential of primary human bronchial cells and, importantly, that transgene  
267 expression (GFP) can still be observed 6 weeks post-differentiation using a fluorescent microscope  
268 (Figure 1C).

269 Thus, we have shown that the cellular composition of transgenic cultures does not differ from  
270 naïve controls and GFP transgene expression can be observed in all cellular subgroups after 6 weeks  
271 of differentiation. Therefore, we conclude that we are able to successfully transduce progenitor basal  
272 cells in suspension prior to the generation of well-differentiated hAEC cultures. This suggests that  
273 FACS sorting of transgene positive cells would not deplete any cell population from the differentiated  
274 cultures and allow for the establishment of transgenic cultures with proper cellular composition and  
275 morphology.

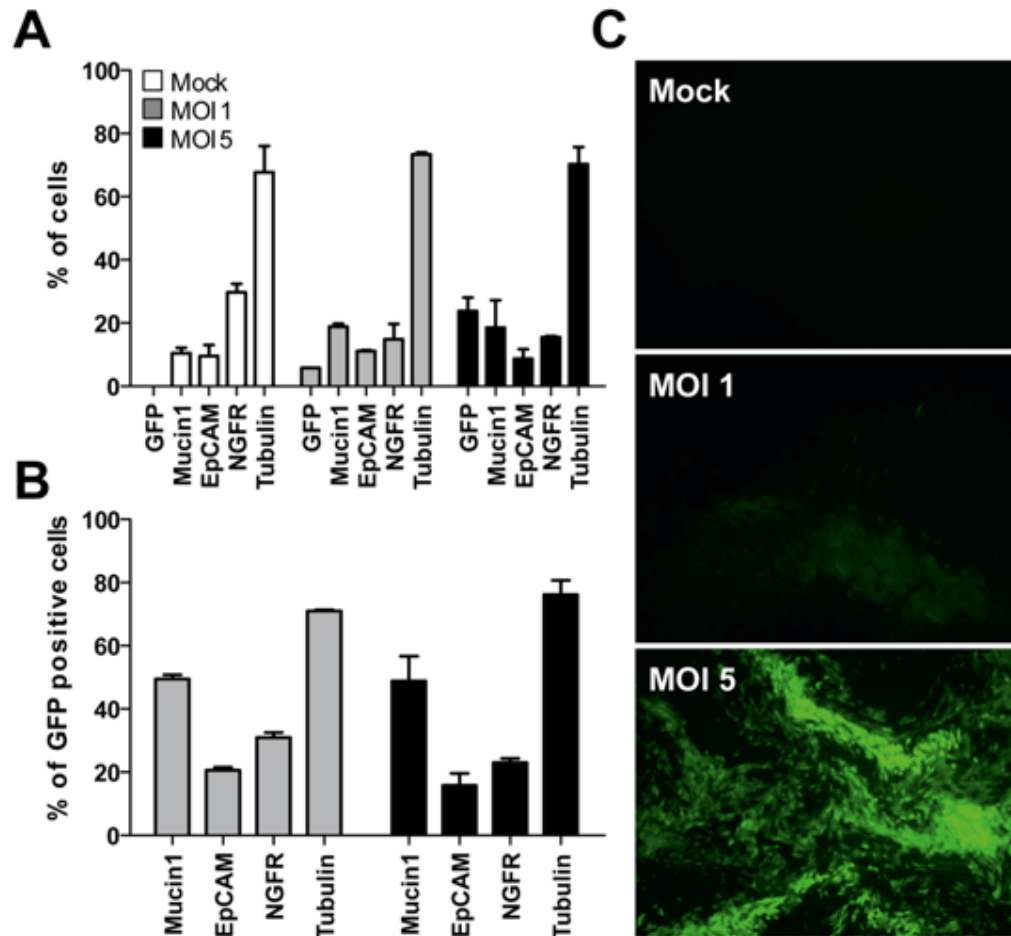

**Figure 1.** Transduction of primary airway epithelial cells does not alter cellular composition and differentiation. **(a)** Comparison of the cellular composition between naïve and heterogeneously transgenic hAECs transfected with two different MOIs of lentivirus 6 weeks post-differentiation by FACS using cell-type specific markers for ciliated (tubulin), goblet (Mucin1), basal (NGFR) and transgene positive cells (GFP). **(b)** Transgene expression among different cell types. **(c)** A representative fluorescent microscopy image of GFP expression levels among naïve and transgenic hAECs 6 weeks post-differentiation.

276

277

278

279

280

281

282

283

### 284 3.2 Treatment of primary cells with Y-27632 prolongs basal cell phenotype

285

286

287

288

289

290

291

292

293

294

295

296

297

298

299

300

Suspension transduction of primary human tracheobronchial cells requires at least two additional passages prior to the establishment of homogeneously transgenic hAEC cultures compared to naïve cells. After transduced cells have been expanded in monolayer, they must be sorted by flow cytometry and re-expanded. Only after that, can the cells be seeded on porous inserts and liquid-liquid interface (LLI) established. Once confluent, the apical medium is aspirated, establishing ALI. By incorporating the necessary transduction, expansion and sorting steps, transgenic tracheobronchial cells cannot be seeded in LLI before monolayer passage three. However, since differentiated hAEC cultures cannot be reliably established after monolayer passage two due to cellular senescence and loss of differentiation potential [16] we had to devise a method that would prolong the lifespan of primary human cells in monolayer culture to allow for lentiviral transduction, expansion and eventual cell sorting.

Treatment of both bronchial and cervical epithelial cells with a commercially available Rho-associated protein kinase (ROCK) inhibitor, Y-27632, has been shown to induce a basal epithelial cell phenotype, thereby preserving the differentiation capabilities of human epithelial cells in vitro [18]. We therefore assessed the differentiation potential of Y-27632 treated primary human bronchial cells in our ALI conditions. Indeed, when these cells were treated with 10  $\mu$ M of Y-27632

301 they showed increased expression of alpha6-integrin and neural growth factor receptor (NGFR),  
 302 common basal cell markers, compared to non-treated cells in later passage (Figure 2A). The  
 303 up-regulation of these basal cell markers indicates that the epithelial basal cell phenotype is induced  
 304 in treated cells, prolonging their life span and differentiation capabilities in vitro. Furthermore, hAEC  
 305 cultures established with treated cells showed the same cellular composition as non-treated cells up  
 306 to passage (p) 4, as measured by the expression of tubulin (ciliated cells), Mucin 1 (goblet cells), and  
 307 NGFR (basal cells) (Figure 2B). Thus, the removal of the inhibitor from culture medium upon LLI  
 308 culture seems to be sufficient for the cells to proceed through differentiation normally post-treatment.  
 309 To confirm proper epithelial structure and morphology, hAEC cultures from both treated and  
 310 non-treated cells were stained for nuclei (DAPI), cilia ( $\beta$ -tubulin) and tight junctions (ZO-1). In low  
 311 passage (p2) the two groups share the same structure and morphology (data not shown). However, in  
 312 p4, only Y-27632 treated cells, independent of donor, were able to maintain epithelial integrity  
 313 post-differentiation. Non-treated cells in p4 seem to differentiate normally early on, evidenced by the  
 314 presence of ciliated cells, but eventually the epithelial layer dissociates and detaches (Figure 2C).

315 Next, we assessed whether Y-27632 treated cells could be transduced to similar levels as naïve  
 316 cells. Suspension transduction of cells isolated from different donors with an MOI of 1 or 5 results in  
 317 varying levels of transduction efficacy (15-35% and 40-70%, respectively) evaluated by the  
 318 percentage of GFP positive cells (Figure 2D, top). Treatment of primary tracheobronchial cells with  
 319 Y-27632 results in slightly lower transduction efficacies under the same conditions (5-30% and  
 320 30-60%, figure 2D, bottom). Interestingly, even when a basal phenotype has been induced in all three  
 321 donors the donor variability is still present and slightly exaggerated compared to naïve cultures  
 322 (Figure 2D). These results indicate that the modification of our protocol, namely, treatment of primary  
 323 human bronchial cells with Y-27632, induces a prolonged basal cell phenotype in our primary human  
 324 bronchial cells. This will accommodate the additional passages required for cellular expansion  
 325 post-lentiviral transduction and cell sorting to establish homogenously transgenic hAEC cultures.  
 326

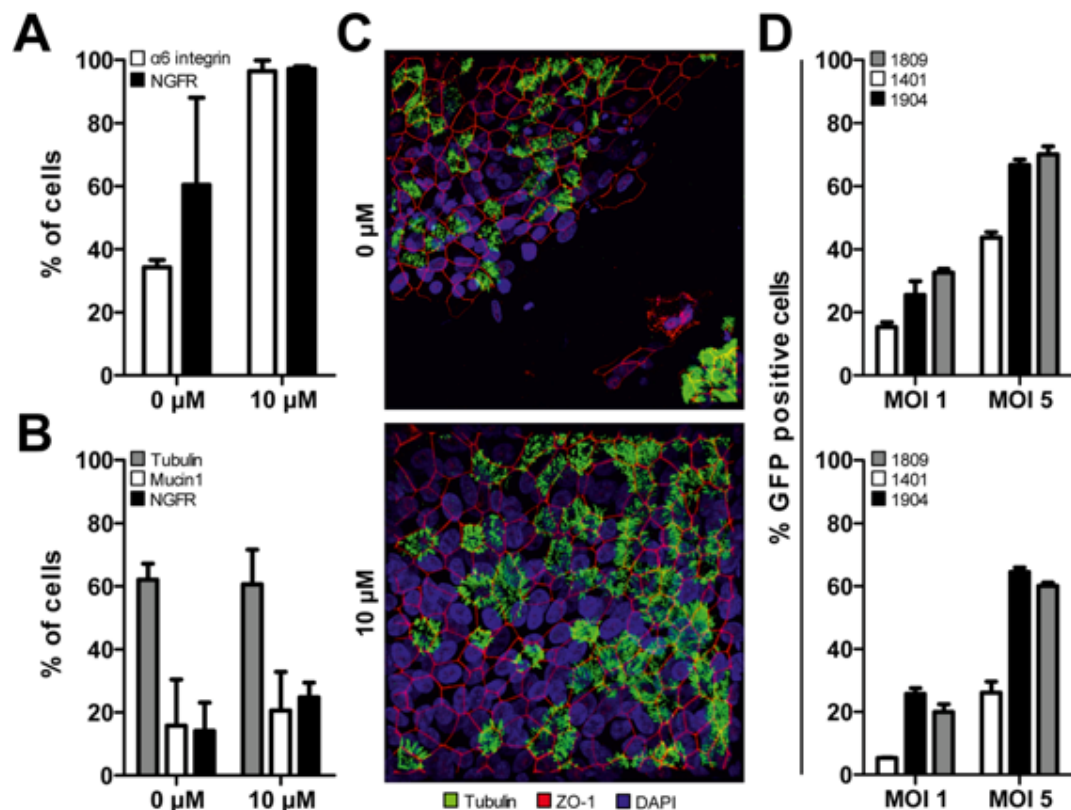

327

328 **Figure 2.** Treatment of primary human tracheobronchial epithelial cells with a Rho-associated protein  
 329 kinase inhibitor (Y-27632) induces a basal cell phenotype and prolongs culture time. (a) Late passage  
 330 (p4) monolayer hAEC cultures treated with 10  $\mu$ M Y-27632 retain a basal cell phenotype. Data is



331 shown as two technical replicates from two individual biological donors. **(b)** Naïve and Y-27632  
332 treated well-differentiated hAEC cultures exhibit the same cellular composition, indicating that  
333 treatment of cells with Y-27632 does not affect cellular differentiation capabilities. Data is shown as  
334 mean of two technical replicates from two individual biological donors. **(c)** A representative maximum  
335 intensity Z-stack projection from late passage (p4) hAEC cultures treated with 0 or 10  $\mu$ M Y-27632.  
336 Demonstrating that hAEC cultures treated with 10  $\mu$ M Y-27632 are able to maintain epithelial integrity  
337 post-differentiation. Original magnification 63x. **(d)** Monolayer hAEC cultures treated with 10  $\mu$ M of  
338 Y-27632 (bottom) can be transduced with lentiviral vectors to similar levels as non-treated hAEC  
339 culture (top). Data is shown as mean of two technical replicates for each individual biological donor.

### 340 3.3 Establishment of homogeneously transgenic hAEC cultures

341 Thus far, we have shown that the establishment of homogeneously transgenic hAEC cultures is  
342 feasible, provided changes are made to the standard cell culture protocol. However, since the  
343 differentiation of hAEC cultures is a delicate process, constitutive knockdown of certain genes could  
344 possibly interfere with differentiation resulting in unusable hAEC cultures post-transduction. For  
345 example, the knockdown of p63, a basal cell transcription factor, results in the loss of epithelial  
346 integrity in hAEC cultures established from a cell line while p63 knockdown in primary cells results in  
347 accelerated cellular senescence and death before ALI can be established [33]. To circumvent these  
348 limitations, we aimed to establish an inducible lentiviral system for gene knockdown in hAEC cultures.  
349 To this end, we modified the inducible shRNA expression lentiviral vector pLKO\_Puro\_IPTG\_3xLacO  
350 to constitutively express the mCherry fluorescence gene instead of a puromycin selection marker,  
351 hereafter referred to as pLKO\_mCherry\_3xLacO. This allows for cell sorting and microscopic  
352 evaluation of cells transduced with this shRNA cassette. Treatment of transduced cells with Isopropyl  
353  $\beta$ -D-1-thiogalactopyranoside (IPTG), a lactose mimic, induces the expression of the shRNA  
354 controlled by the Lactose operon (LacO). For initial evaluation and optimization of the generation of  
355 homogeneously transgenic hAEC cultures, we incorporated the non-mammalian shRNA (shSCR) in  
356 our inducible lentiviral vector (pLKO\_mCherry\_3xLacO).

357 To establish homogeneously transgenic cultures, human tracheobronchial cells were  
358 transduced using the previously established suspension transduction protocol. After initial expansion,  
359 undifferentiated primary airway epithelial cells were sorted for mCherry-positive cells by FACS. The  
360 mCherry-positive cells were then further expanded prior to the establishment of homogeneously  
361 transgenic hAEC cultures. Comparison of naïve and transgenic hAEC cultures revealed the same  
362 morphology, a pseudostratified layer with distinct ciliated cells ( $\beta$ -tubulin, green) and tight junctions  
363 (ZO-1, cyan). Furthermore, nuclear expression of mCherry was observed in all nuclei in the epithelial  
364 layer (red) (Figure 3). This confirms our previous hypothesis that transduction and FACS sorting of  
365 undifferentiated primary bronchial cells does not deplete any cell population from the resulting  
366 differentiated cultures and allows for the establishment of homogeneously transgenic hAEC cultures  
367 with correct anatomical morphology and uniform transgene distribution.

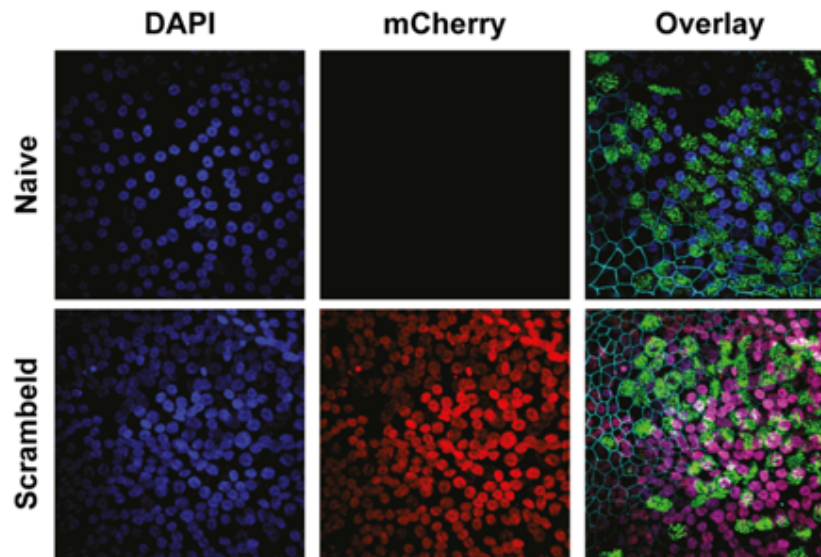

368

369 **Figure 3.** Comparison of the morphology of naïve and homogeneously transgenic hAEC cultures.  
370 Naïve and transgenic hAEC cultures were formalin-fixed 6 weeks post-differentiation and  
371 immunostained with antibodies to visualize the cilia ( $\beta$ -tubulin IV, green), tight junction borders (ZO-1,  
372 cyan), mCherry (red) and counterstained with DAPI to visualize the nuclei (Blue). A representative  
373 maximum intensity Z-stack projection of two individual biological donor is displayed and reveals  
374 correct anatomical morphology and uniform transgene distribution homogeneously transgenic hAEC  
375 cultures. Original magnification 63x.

#### 376 3.4 Successful induction of IPTG-controlled shRNA expression

377 After having successfully demonstrated that homogeneously transgenic hAEC cultures  
378 differentiate normally after lentiviral transduction, we generated two additional  
379 pLKO\_mCherry\_3xLacO vectors containing shRNAs targeting the CDS of the GFP mRNA transcript,  
380 shGFP1 and shGFP2, respectively. We first evaluated the effectiveness of these constructs in  
381 conventional Huh7 cells, as the establishment of homogenous transgenic hAEC cultures requires 6-8  
382 weeks. After simultaneous transduction with two different lentiviral vectors, pLKO\_GFP and  
383 pLKO\_mCherry\_3xLacO, containing shGFP1, shGFP2 or shSCR, the cells were sorted for double  
384 positive GFP/mCherry signal. When we treated double positive cells with 1 mM IPTG for 72 hours, a  
385 reduction in the number of GFP-positive cells could be observed in cells transduced with shGFP, but  
386 not in those with shSCR (figure 4A, top). The reduction of the total number of GFP-positive cells does  
387 not exceed 30% for either GFP specific shRNA. However, when comparing the median fluorescence  
388 intensity (MFI), there is 60-70% reduction of GFP fluorescence in shGFP cells while shSCR cells  
389 have an MFI similar to non-treated controls (figure 4A, bottom). In accordance, fluorescence  
390 microscopy also shows a prominent reduction of fluorescence intensity in treated cells compared to  
391 control (Figure 4B). The knockdown of GFP in Huh7 cells upon induction with IPTG demonstrates the  
392 functionality of different shRNA constructs in our modified inducible pLKO\_mCherry\_3xLacO  
393 lentiviral vector.

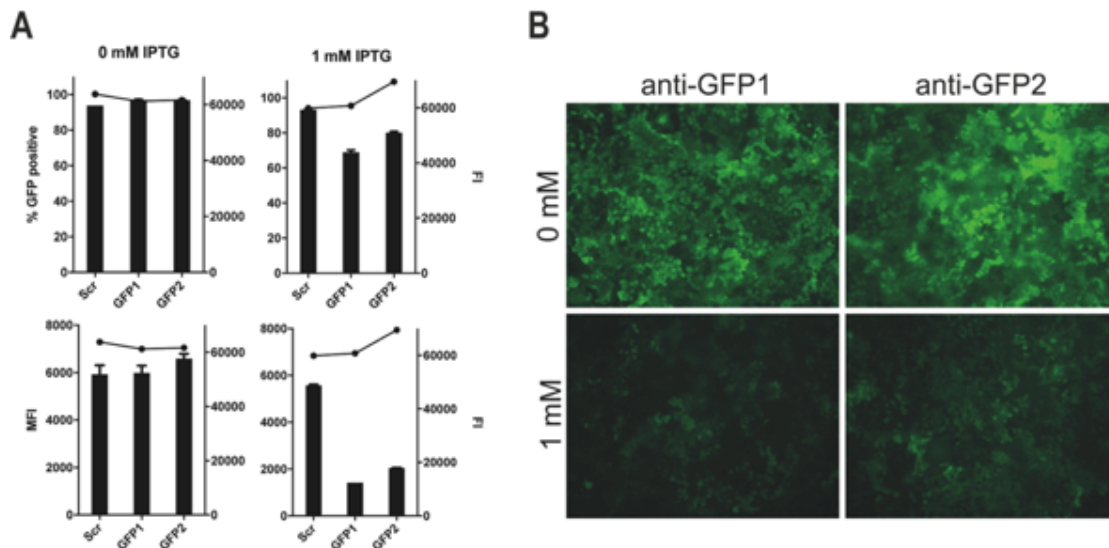

394

395

396

397

398

399

400

401

**Figure 4.** Down-modulation of GFP with an IPTG-inducible shRNA. (a) Huh-7 cells were treated with 0 or 1 mM of IPTG for 72 hours after which the percentage (top left y-axis) and mean fluorescence intensity (MFI; bottom left y-axis) GFP expression was assessed by FACS, in parallel the cell viability was assessed with Alamar Blue (Fluorescence Intensity (FI); right y-axis). The results are shown as means and SD from duplicates from one independent experiment. (b) A representative microscopic image displaying the GFP expression of Huh-7 cells harboring either the shGFP1 and shGFP2 construct after 72 hours of treatment with 0 or 2 mM IPTG. Original magnification 10x.

402

403

404

405

406

407

408

409

410

411

412

413

414

415

416

417

418

419

420

421

422

To demonstrate that host gene expression can also be modulated post-differentiation via inducible shRNA-mediated knockdown we repeated these experiments in primary hAEC cultures using the same method of transduction and cell sorting as described above. After 6 weeks of differentiation, both transgenic and naïve cultures were maintained for 6 consecutive days in the presence or absence of 2 mM IPTG after which GFP expression was analyzed by flow cytometry. Upon induction, we observed approximately 40% reduction in MFI in hAEC cultures expressing shGFP1, whereas induction of shSCR and shGFP2 did not result in pronounced reduction of fluorescence (Figure 4A). This data correlates with the relative GFP mRNA expression level after IPTG-induction where a 50% reduction was observed for shGFP1 alone (Figure 4B). To further corroborate these findings, we used confocal microscopy to visualize GFP expression in transgenic hAEC cultures treated with 2 mM IPTG. Microscopic analysis showed homogeneously transgenic hAEC cultures expressing both mCherry and GFP, as well as the characteristic pattern of the tight-junction marker ZO-1. Furthermore, we observed that GFP signal intensity is heterogeneously distributed in all cultures, but overall the GFP expression in shGFP1 cultures was distinctly weaker compared to shSCR and shGFP2 after induction (Figure 4C). These observations are in agreement with our previous results and provide additional validation of the functionality of our modified lentiviral vector as well as confirming that gene expression can be modulated in hAEC cultures post-differentiation via inducible shRNA-mediated knockdown. However, given the observed discrepancies in the effectiveness of shGFP2 between Huh7 cells and hAEC cultures, individual shRNA constructs intended for the modulation of gene expression in hAEC cultures require careful evaluation and testing.

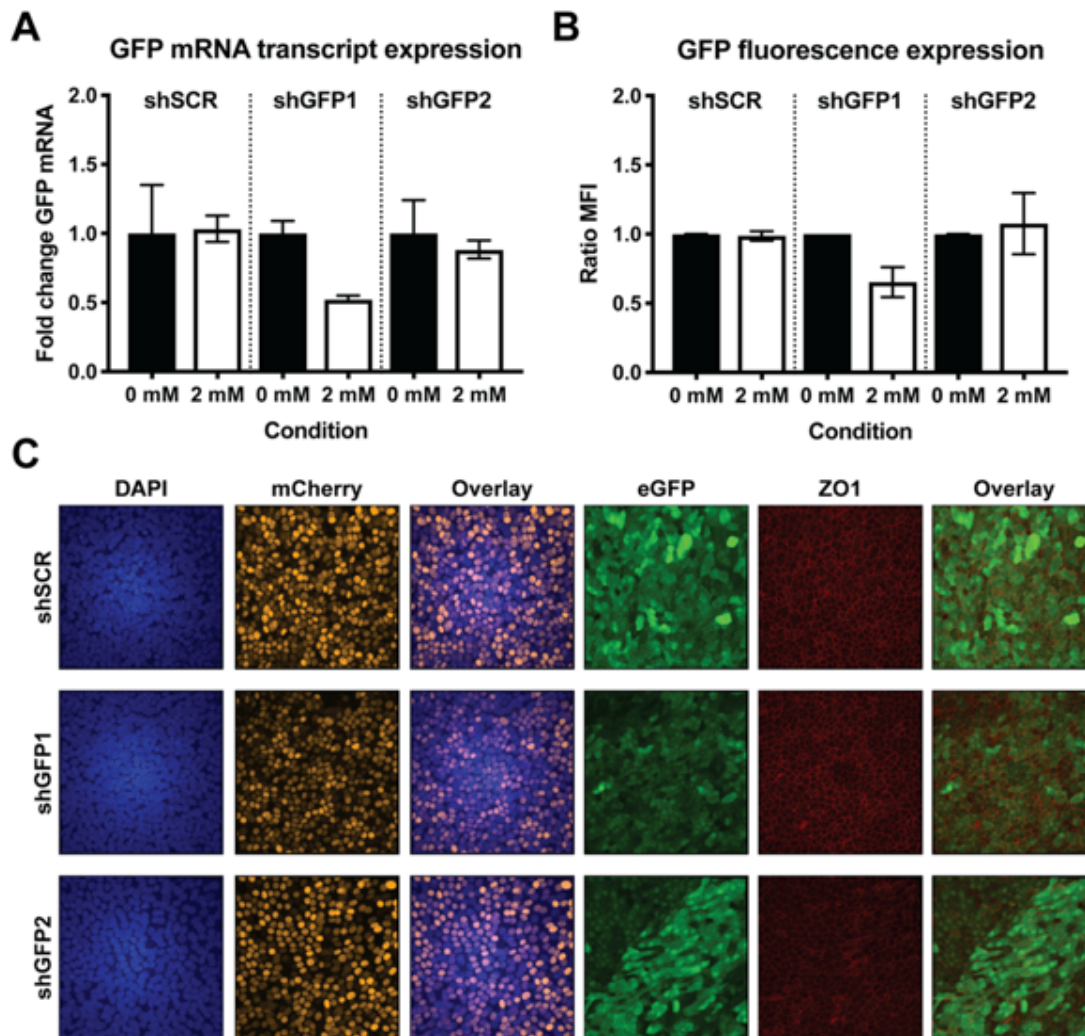

423

424

**Figure 5.** Down-modulation of GFP in well-differentiated homogenous transgenic hAEC cultures.

425

Six-week-old well-differentiated homogenous transgenic hAEC cultures were treated with 0 or 2 mM

426

of IPTG for 6 consecutive days after which the GFP protein expression was analyzed by FACS (a) and

427

the GFP mRNA expression by qPCR (b). The GFP protein expression data is shown as mean and SD

428

from three independent biological donors, whereas the mRNA expression data is shown as mean and

429

SD from two independent biological donors. (c) Moreover, the fluorescence intensity of GFP was

430

assessed in formalin-fixed well-differentiated homogenous transgenic hAEC cultures after 6 days of 2

431

mM IPTG treatment. The cultures were immunostained with antibodies to visualize the mCherry

432

(yellow), GFP (green) and tight junction borders (ZO-1, red) and counterstained with DAPI to visualize

433

the nuclei (Blue). A representative maximum intensity Z-stack projection from two individual biological

434

donors is displayed. Original magnification 63x.

435

436

### 3.5 Transgenesis of primary hAEC cultures does not affect host innate immune response or viral replication

437

In the airways, respiratory pathogens can be detected through the recognition of

438

pathogen-associated molecular patterns (PAMPs) by pattern recognition receptors (PRRs) which are

439

expressed in the hAEC cultures akin to human airway epithelium in vivo [34].

440

Polyinosinic:polycytidylic acid (poly(I:C)) is a synthetic analogue of double stranded RNA (dsRNA), a

441

molecular pattern associated with viral infection that can be recognized by the PRRs TLR-3, RIG-I,

442

and MDA5 [35,36]. The subsequent signaling cascade initiates the production of interferon (IFN) that

443

leads to the induction of several hundred interferon stimulated genes (ISGs), such as the well

444

characterized Myxovirus resistance protein 1 (MxA) [37]. In order to determine whether our genetic



445 modification influences the host innate immune response in transgenic hAEC cultures, we treated  
446 both naïve and homogenously transgenic cultures (shGFP1, shGFP2 and shSCR) with exogenous  
447 poly(I:C), as a proxy for viral infection, after 6-day pre-treatment with 0 or 2 mM IPTG to induce both  
448 mRNA and protein knockdown of GFP. 24 hours post poly(I:C) treatment, we assessed the  
449 expression level of MxA mRNA transcripts, revealing similar gene expression levels in both naïve and  
450 transgenic cultures regardless of shRNA construct and IPTG treatment conditions (Figure 6A). This  
451 indicates that neither the genetic modification, nor the presence of IPTG influences the innate  
452 immune response in homogenously transgenic hAEC cultures.

453 In light of these results, we evaluated whether viral replication could be influenced by  
454 shRNA-mediated knockdown during hAEC infection with GFP expressing human coronavirus 229E  
455 (HCoV-229E-GFP). As stated previously, both naïve and homogenously transgenic hAEC cultures  
456 were pre-treated with 0 or 2 mM IPTG for 6 days prior to inoculation with 10.000 PFU of  
457 HCoV-229E-GFP. Quantification of viral RNA in apical wash revealed similar replication kinetics  
458 for all conditions, indicating that general transgenesis of hAEC cultures does not influence the replication  
459 of HCoV-229E-GFP (Figure 6B). However, unfortunately we did not observe any specific reduction in  
460 replication in those cultures where GFP-directed shRNA had been induced by IPTG (Figure 6B). Since  
461 we have demonstrated that our modified pLKO\_mCherry\_3xLacO lentiviral vector is functional and  
462 able to reduce the expression of cellular GFP upon IPTG induction of GFP-directed shRNAs, we  
463 speculated the failure of GFP knockdown to be cell type specific since HCoV-229E predominantly  
464 infects non-ciliated cells [13]. Therefore, we repeated the experiment with a GFP-expressing human  
465 respiratory syncytial virus (hRSV-GFP) which exhibits a ciliary cell tropism [28]. The obtained results  
466 were in accordance with our previous observations, no difference in viral kinetics between naïve and  
467 homogenously transgenic hAEC cultures was observed after infection with hRSV-GFP. Moreover, as  
468 with HCoV-229E-GFP, we did not observe any reduction of viral replication kinetics in induced  
469 cultures expressing GFP-directed shRNAs (Figure 6C). This suggests that in the context of our  
470 experiments, neither HCoV-229E-GFP nor hRSV-GFP are susceptible to shRNA-mediated  
471 knockdown. However, it also indicates that our results are not cell type dependent, further asserting  
472 the functionality of our transgenic system as a whole. Based on these observations, we rather  
473 hypothesize that the lack of knockdown is due to an insufficient amount of available shRNA within  
474 infected cells to negatively influence the exponential increase of viral GFP mRNA expression while  
475 the levels of cellular GFP mRNA are more suitable for shRNA-mediated knockdown.

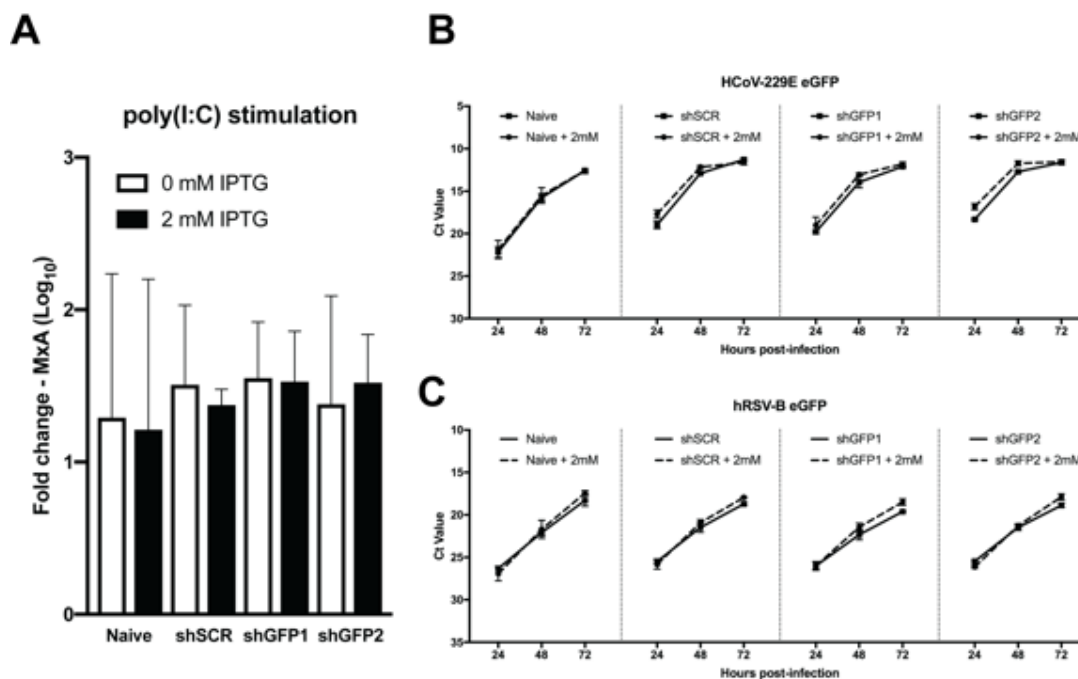



477 **Figure 6.** Transgenesis of primary hAEC cultures does not affect host innate immune response or  
478 viral replication. (a) Six-week-old well-differentiated naïve and homogenous transgenic hAEC cultures  
479 were for 6 consecutive days treated with 0 or 2 mM of IPTG. Afterwards hAEC cultures were  
480 stimulated for an additional 24 hours with exogenous poly(I:C) after which the fold change in MxA  
481 mRNA expression was assessed via qPCR. Data is shown as mean and SD from duplicates from two  
482 individual biological donor. (b) Alternatively, 0 and 2 mM IPTG-treated naïve and homogenous  
483 transgenic hAEC cultures were inoculated with 10.000 PFU of HCoV-229E-GFP or hRSV-B-GFP and  
484 incubated at 33°C. The monitored viral RNA yield is given as Cycle-threshold (Ct) value of isolated  
485 RNA (y-axis) at indicated hours post-inoculation (x-axis) for 33°C. Data is shown as mean and SD  
486 from triplicates from two individual biological donors.

#### 487 **4. Discussion**

488 In this study, we developed a robust and reproducible protocol to generate transgenic hAEC  
489 cultures. We demonstrate that the transduction of primary human tracheobronchial airway epithelial  
490 cells with lentiviral vectors in their undifferentiated state does not interfere with the cellular  
491 composition of the resulting well-differentiated airway epithelial cell cultures. Furthermore, we have  
492 shown that incorporation of the Rho-kinase associated inhibitor Y-27632 during the expansion phase  
493 induces a basal cell phenotype and increases the longevity of primary human bronchial cells. These  
494 results are in direct agreement with the initial publications that first described the induction and  
495 prolongation of a basal cell phenotype in primary cells without gross influence on cell differentiation  
496 capacity [17,18]. By incorporating Y-27632 during the cell propagation phase, we increased the  
497 number of attainable passages prior to the generation of well-differentiated hAEC cultures. In parallel,  
498 by optimizing our lentiviral transduction procedure, we could reproducibly achieve a transduction  
499 efficacy between 30 - 70% in undifferentiated bronchial cells, depending on the amount of lentivirus  
500 and donor used. This allowed us to incorporate a constitutive fluorescent reporter gene into the host  
501 cell genome that facilitates fluorescence-activated cell sorting (FACS) and the subsequent generation  
502 of homogeneously transgenic hAEC cultures that differentiate normally. This fundamental change in  
503 our primary airway epithelial cell culture protocol has been pivotal to successful cellular expansion  
504 post-lentiviral transduction and, subsequently, the establishment of transgenic hAEC cultures  
505 suitable for virus – host interaction studies. During the development and validation of our protocol  
506 other research groups have reported alternatives or improvements to the use of the Rho-kinase  
507 associated inhibitor to further extend the life-span of primary human bronchial cells [38–41]. We  
508 anticipate that the incorporation of these alternative inhibitors and methods will further improve the  
509 currently established protocol to generate homogeneously transgenic hAEC cultures, and might even  
510 facilitate the adaptation of this protocol to primary airway epithelial cells from other species to further  
511 elucidate molecular virus – host interactions without using animal models.

512 In the current study, we have demonstrated that we can modulate gene expression in transgenic  
513 hAEC cultures post-differentiation via inducible shRNA-mediated knockdown. However, gene  
514 expression modulation using shRNA requires careful evaluation of the effectiveness of individual  
515 shRNA constructs, as only one out of two shRNAs against GFP was effective in our homogeneously  
516 transgenic hAEC cultures while both were effective in a cell line model. Additionally, we observed that  
517 GFP brightness was reduced by approximately 40% upon induction, and in the context of modulating  
518 host gene expression to study virus – host interactions this might not be sufficient to observe a  
519 phenotype. Nonetheless, since we demonstrate that an inducible lentiviral system is operational  
520 post-differentiation, alternative methods of host gene modifications can now be explored. For  
521 instance, microRNA (miRNA) mimics in conjunction with a fluorescent reporter gene under the control  
522 of an inducible Polymerase II promoter [42] would allow monitoring and quantification of the  
523 expression level of the miRNA mimic, providing a better-controlled system. Alternatively, employing  
524 inducible CRISPR-mediated gene editing would allow the modulation of host gene expression by  
525 either repression (CRISPRi) or activation (CRISPRa) [43]. All these potential methods require  
526 lentiviral-mediated transduction, which can be achieved with the currently established protocol.

527 Unfortunately, in our experiments, we did not observe any inhibition of viral replication through  
528 shRNA-mediated knockdown targeting the GFP gene in the HCoV-229E and hRSV reporter viruses.  
529 Since we observed the same phenotype with two viruses with differential cell tropism, non-ciliated

530 and ciliated cells respectively, there seems to be no cell-type bias for shRNA-mediated knockdown in  
531 homogenously transgenic hAEC cultures. This is further corroborated by the uniform reduction of  
532 GFP expression by shGFP1 in our double transgenic hAECs, in which the MFI of GFP fluorescence is  
533 reduced by approximately 40%. Due to low inoculation dose (MOI 0.1), we hypothesize that the  
534 amount of shRNA targeting the viral GFP mRNA transcript simply is not sufficient to achieve a  
535 pronounced reduction of the logarithmic increase of viral replication. Adaptation of the inoculation  
536 dosage or even the Polymerase III promoter in the lentiviral vector to achieve a higher cellular  
537 concentration of shRNA might reveal a different phenotype. It has been reported that the viral  
538 nucleoprotein of HCoV-229E counteracts RNA silencing [44], which might also be the case for hRSV,  
539 rendering our shRNA ineffective against these viruses. Further characterization and validation of this  
540 phenomenon is fascinating but beyond the scope of this study.

541 Taken together, these results demonstrate that we have successfully established a robust and  
542 reproducible protocol to make hAEC cultures amenable to genetic modification using lentiviral  
543 vectors. This will greatly facilitate detailed studies on molecular virus – host interactions in primary  
544 human airway epithelium.

545 **Author Contributions:** Conceptualization, Hulda Jonsdottir, Volker Thiel and Ronald Dijkman; Data curation,  
546 Hulda Jonsdottir and Ronald Dijkman; Formal analysis, Hulda Jonsdottir and Ronald Dijkman; Funding  
547 acquisition, Volker Thiel and Ronald Dijkman; Investigation, Hulda Jonsdottir and Ronald Dijkman; Methodology,  
548 Hulda Jonsdottir, Sabrina Marti and Ronald Dijkman; Resources, Dirk Geerts and Regulo Rodriguez;  
549 Supervision, Volker Thiel and Ronald Dijkman; Visualization, Hulda Jonsdottir and Ronald Dijkman; Writing –  
550 original draft, Hulda Jonsdottir; Writing – review & editing, Hulda Jonsdottir and Ronald Dijkman.

551 **Funding:** This project was funded by the 3R foundation Switzerland, project number 128-11 (RD and VT) and  
552 the Swiss National Science Foundation grants 310030\_179260 (RD) and 310030\_173085 (VT). The funders had  
553 no role in study design, data collection and analysis, decision to publish, or preparation of the manuscript.

554 **Acknowledgments:** We acknowledge Prof. Dr. B. Berkhoud and Dr. J. Eekels for providing lentiviral plasmids  
555 for lentiviral particle production, Prof. Dr. P. Duprex for contributing GFP expressing Respiratory Syncytial Virus,  
556 and Dominik Florek for his efforts during the initial stages of the project.

557 **Conflicts of Interest:** The authors declare no conflict of interest.

## 558 References

- 559 1. Rackley, C.R.; Stripp, B.R. Building and maintaining the epithelium of the lung. *J Clin Invest* **2012**, *122*,  
560 2724–2730.
- 561 2. Randell, S.H.; Boucher, R.C. Effective mucus clearance is essential for respiratory health. *Am. J. Respir.*  
562 *Cell Mol. Biol.* 2006.
- 563 3. Rock, J.R.; Onaitis, M.W.; Rawlins, E.L.; Lu, Y.; Clark, C.P.; Xue, Y.; Randell, S.H.; Hogan, B.L.M. Basal  
564 cells as stem cells of the mouse trachea and human airway epithelium. *Proc. Natl. Acad. Sci.* **2009**.
- 565 4. Pezzulo, A.A.; Starner, T.D.; Scheetz, T.E.; Traver, G.L.; Tilley, A.E.; Harvey, B.-G.; Crystal, R.G.;  
566 McCray, P.B.; Zabner, J. The air-liquid interface and use of primary cell cultures are important to  
567 recapitulate the transcriptional profile of in vivo airway epithelia. *Am. J. Physiol. Cell. Mol. Physiol.* **2010**.
- 568 5. de Jong, P.M.; van Sterkenburg, M.A.J.A.; Kempenaar, J.A.; Dijkman, J.H.; Ponec, M. Serial culturing of  
569 human bronchial epithelial cells derived from biopsies. *Vitr. Cell. Dev. Biol. - Anim. J. Soc. Vitr. Biol.*  
570 **1993**.
- 571 6. de Jong, P.M.; van Sterkenburg, M.A.; Hesselink, S.C.; Kempenaar, J.A.; Mulder, A.A.; Mommaas, A.M.;  
572 Dijkman, J.H.; Ponec, M. Ciliogenesis in human bronchial epithelial cells cultured at the air-liquid  
573 interface. *Am. J. Respir. Cell Mol. Biol.* **1994**.
- 574 7. Matrosovich, M.N.; Matrosovich, T.Y.; Gray, T.; Roberts, N.A.; Klenk, H.D. Human and avian influenza

- 575 viruses target different cell types in cultures of human airway epithelium. *Proc Natl Acad Sci U S A* **2004**,  
576 101, 4620–4624.
- 577 8. Zhang, L.; Bukreyev, A.; Thompson, C.I.; Watson, B.; Peeples, M.E.; Collins, P.L.; Pickles, R.J. Infection  
578 of ciliated cells by human parainfluenza virus type 3 in an in vitro model of human airway epithelium. *J*  
579 *Viro* **2005**, 79, 1113–1124.
- 580 9. Sims, A.C.; Baric, R.S.; Yount, B.; Burkett, S.E.; Collins, P.L.; Pickles, R.J. Severe acute respiratory  
581 syndrome coronavirus infection of human ciliated airway epithelia: role of ciliated cells in viral spread in  
582 the conducting airways of the lungs. *J Virol* **2005**, 79, 15511–15524.
- 583 10. Dijkman, R.; Koekkoek, S.M.; Molenkamp, R.; Schildgen, O.; van der Hoek, L. Human bocavirus can be  
584 cultured in differentiated human airway epithelial cells. *J Virol* **2009**, 83, 7739–7748.
- 585 11. Pirc, K.; Sims, A.C.; Dijkman, R.; Jebbink, M.; Long, C.; Deming, D.; Donaldson, E.; Vabret, A.; Baric,  
586 R.; Van Der Hoek, L.; et al. Culturing the unculturable: Human coronavirus HKU1 infects, replicates, and  
587 produces progeny virions in human ciliated airway epithelial cell cultures. *J. Virol.* **2010**, 84.
- 588 12. Kindler, E.; Jonsdottir, H.R.; Muth, D.; Hamming, O.J.; Hartmann, R.; Rodriguez, R.; Geffers, R.;  
589 Fouchier, R.A.M.; Drosten, C.; Muller, M.A.; et al. Efficient replication of the novel human  
590 betacoronavirus EMC on primary human epithelium highlights its zoonotic potential. *MBio* **2013**, 4,  
591 e00611-12.
- 592 13. Dijkman, R.; Jebbink, M.F.; Koekkoek, S.M.; Deijs, M.; Jónsdóttir, H.R.; Molenkamp, R.; Ieven, M.;  
593 Goossens, H.; Thiel, V.; van der Hoek, L. Isolation and Characterization of Current human coronavirus  
594 strains in primary human epithelial cell cultures reveal differences in target cell tropism. *J. Virol.* **2013**, 87.
- 595 14. Tseng, C.-T.K.; Huang, C.; Newman, P.; Wang, N.; Narayanan, K.; Watts, D.M.; Makino, S.; Packard,  
596 M.M.; Zaki, S.R.; Chan, T. -s.; et al. Severe Acute Respiratory Syndrome Coronavirus Infection of Mice  
597 Transgenic for the Human Angiotensin-Converting Enzyme 2 Virus Receptor. *J. Virol.* **2007**.
- 598 15. Barnard, D.L. Animal models for the study of influenza pathogenesis and therapy. *Antiviral Res.* 2009.
- 599 16. Gray, T.E.; Guzman, K.; Davis, C.W.; Abdullah, L.H.; Nettesheim, P. Mucociliary differentiation of serially  
600 passaged normal human tracheobronchial epithelial cells. *Am J Respir Cell Mol Biol* **1996**, 14, 104–112.
- 601 17. Liu, X.; Ory, V.; Chapman, S.; Yuan, H.; Albanese, C.; Kallakury, B.; Timofeeva, O.A.; Nealon, C.; Dakic,  
602 A.; Simic, V.; et al. ROCK inhibitor and feeder cells induce the conditional reprogramming of epithelial  
603 cells. *Am J Pathol* **2012**, 180, 599–607.
- 604 18. Suprynovicz, F.A.; Upadhyay, G.; Krawczyk, E.; Kramer, S.C.; Hebert, J.D.; Liu, X.; Yuan, H.;  
605 Cheluvvaraju, C.; Clapp, P.W.; Boucher Jr., R.C.; et al. Conditionally reprogrammed cells represent a  
606 stem-like state of adult epithelial cells. *Proc Natl Acad Sci U S A* **2012**, 109, 20035–20040.
- 607 19. Jonsdottir, H.R.; Dijkman, R. Characterization of human coronaviruses on well-differentiated human  
608 airway epithelial cell cultures. *Methods Mol. Biol.* **2015**, 1282, 73–87.

- 609 20. Paddison, P.J.; Caudy, A.A.; Bernstein, E.; Hannon, G.J.; Conklin, D.S. Short hairpin RNAs (shRNAs)  
610 induce sequence-specific silencing in mammalian cells. *Genes Dev.* **2002**, *16*, 948–58.
- 611 21. Taxman, D.J.; Moore, C.B.; Guthrie, E.H.; Huang, M.T.-H. Short Hairpin RNA (shRNA): Design, Delivery,  
612 and Assessment of Gene Knockdown. In *Methods in molecular biology (Clifton, N.J.)*; 2010; Vol. 629, pp.  
613 139–156.
- 614 22. Mao, Y.; Yan, R.; Li, A.; Zhang, Y.; Li, J.; Du, H.; Chen, B.; Wei, W.; Zhang, Y.; Sumners, C.; et al.  
615 Lentiviral Vectors Mediate Long-Term and High Efficiency Transgene Expression in HEK 293T cells. *Int.*  
616 *J. Med. Sci.* **2015**, *12*, 407–15.
- 617 23. Everman, J.L.; Rios, C.; Seibold, M.A. Primary Airway Epithelial Cell Gene Editing Using CRISPR-Cas9.  
618 In *Methods in molecular biology (Clifton, N.J.)*; 2018; Vol. 1706, pp. 267–292.
- 619 24. Munye, M.M.; Shoemark, A.; Hirst, R.A.; Delhove, J.M.; Sharp, T. V; McKay, T.R.; O'Callaghan, C.;  
620 Baines, D.L.; Howe, S.J.; Hart, S.L. BMI-1 extends proliferative potential of human bronchial epithelial  
621 cells while retaining their mucociliary differentiation capacity. *Am. J. Physiol. Lung Cell. Mol. Physiol.*  
622 **2017**, *312*, L258–L267.
- 623 25. Sinn, P.L.; Hwang, B.-Y.; Li, N.; Ortiz, J.L.S.; Shirazi, E.; Parekh, K.R.; Cooney, A.L.; Schaffer, D. V;  
624 McCray, P.B. Novel GP64 envelope variants for improved delivery to human airway epithelial cells. *Gene*  
625 *Ther.* **2017**, *24*, 674–679.
- 626 26. Eekels, J.J.; Geerts, D.; Jeeninga, R.E.; Berkhout, B. Long-term inhibition of HIV-1 replication with RNA  
627 interference against cellular co-factors. *Antivir. Res* **2011**, *89*, 43–53.
- 628 27. Cervantes-Barragan, L.; Zust, R.; Maier, R.; Sierro, S.; Janda, J.; Levy, F.; Speiser, D.; Romero, P.;  
629 Rohrlisch, P.S.; Ludewig, B.; et al. Dendritic cell-specific antigen delivery by coronavirus vaccine vectors  
630 induces long-lasting protective antiviral and antitumor immunity. *MBio* **2010**, *1*.
- 631 28. Lemon, K.; Nguyen, D.T.; Ludlow, M.; Rennick, L.J.; Yuksel, S.; van Amerongen, G.; McQuaid, S.; Rima,  
632 B.K.; de Swart, R.L.; Duprex, W.P. Recombinant subgroup B human respiratory syncytial virus  
633 expressing enhanced green fluorescent protein efficiently replicates in primary human cells and is  
634 virulent in cotton rats. *J Virol* **2015**, *89*, 2849–2856.
- 635 29. Livak, K.J.; Schmittgen, T.D. Analysis of relative gene expression data using real-time quantitative PCR  
636 and the 2<sup>(-Delta Delta C(T))</sup> Method. *Methods* **2001**, *25*, 402–408.
- 637 30. Vijgen, L.; Keyaerts, E.; Moes, E.; Maes, P.; Duson, G.; Van Ranst, M. Development of one-step,  
638 real-time, quantitative reverse transcriptase PCR assays for absolute quantitation of human  
639 coronaviruses OC43 and 229E. *J Clin Microbiol* **2005**, *43*, 5452–5456.
- 640 31. van de Pol, A.C.; van Loon, A.M.; Wolfs, T.F.; Jansen, N.J.; Nijhuis, M.; Breteler, E.K.; Schuurman, R.;  
641 Rossen, J.W. Increased detection of respiratory syncytial virus, influenza viruses, parainfluenza viruses,  
642 and adenoviruses with real-time PCR in samples from patients with respiratory symptoms. *J Clin*  
643 *Microbiol* **2007**, *45*, 2260–2262.

- 644 32. Kremer, K.L.; Dunning, K.R.; Parsons, D.W.; Anson, D.S. Gene delivery to airway epithelial cells in vivo:  
645 a direct comparison of apical and basolateral transduction strategies using pseudotyped lentivirus  
646 vectors. *J. Gene Med.* **2007**, *9*, 362–8.
- 647 33. Arason, A.J.; Jonsdottir, H.R.; Halldorsson, S.; Benediktsdottir, B.E.; Bergthorsson, J.T.; Ingthorsson, S.;  
648 Baldursson, O.; Sinha, S.; Gudjonsson, T.; Magnusson, M.K. deltaNp63 Has a Role in Maintaining  
649 Epithelial Integrity in Airway Epithelium. *PLoS One* **2014**, *9*, e88683.
- 650 34. Lauber, C.; Vieyres, G.; Terczynska-Dyla, E.; Anggakusuma; Dijkman, R.; Gad, H.H.; Akhtar, H.;  
651 Geffers, R.; Vondran, F.W.; Thiel, V.; et al. Transcriptome analysis reveals a classical interferon  
652 signature induced by IFNlambda4 in human primary cells. *Genes Immun* **2015**, *16*, 414–421.
- 653 35. Alexopoulou, L.; Holt, A.C.; Medzhitov, R.; Flavell, R.A. Recognition of double-stranded RNA and  
654 activation of NF-kappaB by Toll-like receptor 3. *Nature* **2001**, *413*, 732–738.
- 655 36. Kato, H.; Takeuchi, O.; Sato, S.; Yoneyama, M.; Yamamoto, M.; Matsui, K.; Uematsu, S.; Jung, A.;  
656 Kawai, T.; Ishii, K.J.; et al. Differential roles of MDA5 and RIG-I helicases in the recognition of RNA  
657 viruses. *Nature* **2006**, *441*, 101–105.
- 658 37. Haller, O.; Staeheli, P.; Schwemmler, M.; Kochs, G. Mx GTPases: dynamin-like antiviral machines of  
659 innate immunity. *Trends Microbiol* **2015**, *23*, 154–163.
- 660 38. Mou, H.; Vinarsky, V.; Tata, P.R.; Brazauskas, K.; Choi, S.H.; Crooke, A.K.; Zhang, B.; Solomon, G.M.;  
661 Turner, B.; Bihler, H.; et al. Dual SMAD Signaling Inhibition Enables Long-Term Expansion of Diverse  
662 Epithelial Basal Cells. *Cell Stem Cell* **2016**, *19*, 217–231.
- 663 39. Brody, S.L.; Kaiko, G.E. Harnessing TGF- $\beta$  and BMP signaling for expansion of p63-positive epithelial  
664 stem cells. *Stem Cell Investig.* **2016**, *3*, 82–82.
- 665 40. Guyot, B.; Maguer-Satta, V. Blocking TGF- $\beta$  and BMP SMAD-dependent cell differentiation is a master  
666 key to expand all kinds of epithelial stem cells. *Stem cell Investig.* **2016**, *3*, 88.
- 667 41. Zhang, C.; Lee, H.J.; Shrivastava, A.; Wang, R.; McQuiston, T.J.; Challberg, S.S.; Pollok, B.A.; Wang, T.  
668 Long-Term In Vitro Expansion of Epithelial Stem Cells Enabled by Pharmacological Inhibition of  
669 PAK1-ROCK-Myosin II and TGF- $\beta$  Signaling. *Cell Rep.* **2018**, *25*, 598-610.e5.
- 670 42. Liu, Y.P.; Schopman, N.C.T.; Berkhout, B. Dicer-independent processing of short hairpin RNAs. *Nucleic  
671 Acids Res.* **2013**, *41*, 3723–3733.
- 672 43. Gilbert, L.A.; Horlbeck, M.A.; Adamson, B.; Villalta, J.E.; Chen, Y.; Whitehead, E.H.; Guimaraes, C.;  
673 Panning, B.; Ploegh, H.L.; Bassik, M.C.; et al. Genome-Scale CRISPR-Mediated Control of Gene  
674 Repression and Activation. *Cell* **2014**, *159*, 647–661.
- 675 44. Cui, L.; Wang, H.; Ji, Y.; Yang, J.; Xu, S.; Huang, X.; Wang, Z.; Qin, L.; Tien, P.; Zhou, X.; et al. The  
676 Nucleocapsid Protein of Coronaviruses Acts as a Viral Suppressor of RNA Silencing in Mammalian  
677 Cells. *J Virol* **2015**, *89*, 9029–9043.
